# Supplementary material
Source: PubMed Central journal article supplement (PMC5599934)
Supplement: NIHMS877794-supplement-Appendix.pdf [file NIHMS877794-supplement-Appendix.pdf]

# THE LANCET

## Infectious Diseases

### Supplementary appendix

This appendix formed part of the original submission and has been peer reviewed. We post it as supplied by the authors.

Supplement to: Sharma A, Hill A, Kurbatova E, et al, for the Global Preserving Effective TB Treatment Study Investigators. Estimating the future burden of multidrug-resistant and extensively drug-resistant tuberculosis in India, the Philippines, Russia, and South Africa: a mathematical modelling study. *Lancet Infect Dis* 2017; published online May 9. [http://dx.doi.org/10.1016/S1473-3099\(17\)30247-5](http://dx.doi.org/10.1016/S1473-3099(17)30247-5).

## Technical Appendix 1. Differential equations

The deterministic model consists of a series of differential equations that represent TB and HIV transmission, generation of resistance to TB medicines during treatment, and outcomes of TB and HIV infection based on underlying TB status. The differential equations used to model these states and outcomes are summarized below.

### Susceptible

$$dS^n/dt = \Pi - (\lambda_L^n + \lambda_A^n + \mu^n + \tau)S^n + rN \left(1 - \frac{N}{k}\right)$$

$$dS^h/dt = \omega S^a + \tau S^n - (\lambda_L^h + \lambda_A^h + \mu^h + \theta)S^h$$

$$dS^a/dt = \theta S^h - (\lambda_L^h + \lambda_A^a + \mu^a + \omega)S^a$$

### Latent TB infection

$$dL_i^n/dt = \lambda_{L,i}^n(S^n + L^n + R_t^n + R_u^n) - (\lambda_L^n + \lambda_A^n + v^n + \mu^n + \tau)L_i^n$$

$$dL_i^h/dt = \lambda_{L,i}^h(S^h + L^h + R_t^h + R_u^h) - (\lambda_L^h + \lambda_A^h + v^h + \mu^h + \theta)L_i^h + \tau L_i^n + \omega L_i^a$$

$$dL_i^a/dt = \lambda_{L,i}^a(S^a + L^a + R_t^a + R_u^a) - (\lambda_L^h + \lambda_A^a + v^a + \mu^a + \omega)L_i^a + \theta L_i^h$$

### Active TB, not on treatment

$$dI_i^n/dt = \lambda_{A,i}^n(S^n + L^n + R_t^n + R_u^n) + v^n L_i^n + \alpha_u R_{u,i}^n + \alpha_t^n R_{t,i}^n + \delta_i^n D_i^n - (\chi^m + \phi_u^n + \mu_u^n)I_i^n + \sum \rho_{j,i}^n D_j^n$$

$$dI_i^h/dt = \lambda_{A,i}^h(S^h + L^h + R_t^h + R_u^h) + v^h L_i^h + \alpha_u R_{u,i}^h + \alpha_t^h R_{t,i}^h + \delta_i^h D_i^h - (\chi^m + \phi_u^h + \mu_u^h)I_i^h + \sum \rho_{j,i}^h D_j^h$$

$$dI_i^a/dt = \lambda_{A,i}^a(S^a + L^a + R_t^a + R_u^a) + v^a L_i^a + \alpha_u R_{u,i}^a + \alpha_t^a R_{t,i}^a + \delta_i^a D_i^a - (\chi^m + \phi_u^a + \mu_u^a)I_i^a + \sum \rho_{j,i}^a D_j^a$$

### Active TB, on treatment

$$dD_i^n/dt = \chi^m I_i^n - (\mu_{t,i}^n + \phi_{t,i}^n + \delta_i^n + \sum \rho_{j,i}^n)D_i^n$$

$$dD_x^h/dt = \chi^m I_i^h - (\mu_{t,i}^h + \phi_{t,i}^h + \delta_i^h + \sum \rho_{j,i}^h)D_i^h$$

$$dD_x^a/dt = \chi^m I_i^a - (\mu_{t,i}^a + \phi_{t,i}^a + \delta_i^a + \sum \rho_{j,i}^a)D_i^a$$

### Recovered from active TB, spontaneous

$$dR_{u,i}^n/dt = \phi_u^n I_i^n - (\lambda_L^n + \lambda_A^n + \alpha_u + \mu^n + \tau)R_{u,i}^n$$

$$dR_{u,i}^h/dt = \phi_u^h I_i^h - (\lambda_L^h + \lambda_A^h + \alpha_u + \mu^h + \theta)R_{u,i}^h + \tau R_{u,i}^n + \omega R_{u,i}^a$$

$$dR_{u,i}^a/dt = \phi_u^a I_i^a - (\lambda_L^h + \lambda_A^a + \alpha_u + \mu^a + \omega)R_{u,i}^a + \theta R_{u,i}^h$$

### Recovered from active TB, treatment

$$dR_{t,i}^n/dt = \phi_{t,i}^n D_i^n - (\lambda_L^n + \lambda_A^n + \alpha^n + \mu^n + \tau)R_{t,i}^n$$

$$dR_{t,i}^h/dt = \phi_{t,i}^h D_i^h - (\lambda_L^h + \lambda_A^h + \alpha^h + \mu^h + \theta)R_{t,i}^h + \tau R_{t,i}^n + \omega R_{t,i}^a$$

$$dR_{t,i}^a/dt = \phi_{t,i}^a D_i^a - (\lambda_L^h + \lambda_A^a + \alpha^a + \mu^a + \omega)R_{t,i}^a + \theta R_{t,i}^h$$

### Force of infection

$$\lambda_{L,i}^p = [ p_L^{p,p} \beta_T (I_i^a + I_i^h) + p_L^{n,p} \beta_T I_i^n ] / N$$

$$\lambda_{L,i}^n = [ p_L^{p,n} \beta_T (I_i^a + I_i^h) + p_L^{n,n} \beta_T I_i^n ] / N$$

$$\lambda_{A,i}^p = [ p_A^{p,p} \beta_T (I_i^a + I_i^h) + p_A^{n,p} \beta_T I_i^n ] / N$$

$$\lambda_{A,i}^n = [ p_A^{p,n} \beta_T (I_i^a + I_i^h) + p_A^{n,n} \beta_T I_i^n ] / N$$

$$\lambda_H = \beta_H (S^h + L^h + I^h + D^h + R_u^h + R_t^h) / N$$

### **Compartments:**

S = Susceptible

L = Latent TB infection

I = Active TB, not on treatment

D = Active TB, on treatment

R = Recovered TB

### **Superscripts:**

n = HIV negative

h = HIV positive not on ART

a = HIV positive on ART

m = MDR or non-MDR

p,n = HIV-positive to HIV-negative

p,p = HIV-positive to HIV-positive

n,n = HIV-negative to HIV-negative

n,p = HIV-negative to HIV-positive

### **Subscripts:**

i = TB strain with particular drug resistance profile

j = TB strain with drug resistance profile other than i

u = not treated

t = treated

A = active TB

L = latent TB

H = HIV

T = TB

### **Rates:**

$\Pi$  = birth rate

$\lambda$  = TB force of infection

$\mu$  = mortality rate

$\tau$  = HIV force of infection

$\omega$  = nonadherence rate for ART

$\theta$  = rate of starting ART

$\nu$  = reactivation rate for latent TB infection

$\alpha$  = relapse rate

$\delta$  = lost to follow up rate for TB on treatment

$\rho$  = acquisition / amplification of drug resistance

$\chi$  = rate of initiating TB treatment

$\phi$  = TB cure rate

$r$  = population growth rate

$\beta$  = contact rate

### **Other:**

N = total population

k = population cap

p = probability of acquiring latent TB infection or active TB on contact

## Technical Appendix 2. Population growth

Population growth was modeled to follow a logistic growth function calibrated to population projections from the United Nations Population and Demographics.<sup>1</sup> Population growth follows the following differential equation:

$$dN/dt = rN \left(1 - \frac{N}{k}\right)$$

$r$ ,  $k$  were estimated using nonlinear regression via the NLS function in R. In our model, growth was modelled as additional births into the HIV negative susceptible compartment;  $\Pi$  was set to the overall mortality rate across all compartments. The data used for estimations of  $r$  and  $k$  were derived from UN projections, listed in Appendix Table 1 for each country.

**Appendix Table 1. Country-specific population projections used for population growth calibration.**

| Year | South Africa | India       | Philippines | Russia      |
|------|--------------|-------------|-------------|-------------|
| 1960 | 17,396,000   | 449,661,874 | 26,273,023  | 119,897,000 |
| 1961 | 17,949,962   | 458,691,457 | 27,164,618  | 121,236,000 |
| 1962 | 18,459,442   | 468,054,145 | 28,081,234  | 122,591,000 |
| 1963 | 18,936,138   | 477,729,958 | 29,016,770  | 123,960,000 |
| 1964 | 19,390,554   | 487,690,114 | 29,962,877  | 125,345,000 |
| 1965 | 19,832,000   | 497,920,270 | 30,913,931  | 126,745,000 |
| 1966 | 20,268,594   | 508,402,908 | 31,867,565  | 127,468,000 |
| 1967 | 20,707,258   | 519,162,069 | 32,826,602  | 128,196,000 |
| 1968 | 21,153,722   | 530,274,729 | 33,797,041  | 128,928,000 |
| 1969 | 21,612,522   | 541,844,848 | 34,787,588  | 129,664,000 |
| 1970 | 22,087,000   | 553,943,226 | 35,804,731  | 130,404,000 |
| 1971 | 22,602,373   | 566,605,402 | 36,851,055  | 131,155,000 |
| 1972 | 23,126,276   | 579,800,632 | 37,925,400  | 131,909,000 |
| 1973 | 23,655,908   | 593,451,889 | 39,026,082  | 132,669,000 |
| 1974 | 24,189,837   | 607,446,519 | 40,149,959  | 133,432,000 |
| 1975 | 24,728,000   | 621,703,641 | 41,295,129  | 134,200,000 |
| 1976 | 25,268,094   | 636,182,810 | 42,461,189  | 135,147,000 |
| 1977 | 25,805,575   | 650,907,559 | 43,650,333  | 136,100,000 |
| 1978 | 26,355,319   | 665,936,435 | 44,866,279  | 137,060,000 |
| 1979 | 26,940,793   | 681,358,553 | 46,113,992  | 138,027,000 |
| 1980 | 27,576,000   | 697,229,745 | 47,396,966  | 139,010,000 |
| 1981 | 28,254,655   | 713,561,406 | 48,715,592  | 139,941,000 |
| 1982 | 28,971,839   | 730,303,461 | 50,068,493  | 140,823,000 |
| 1983 | 29,724,004   | 747,374,856 | 51,455,037  | 141,668,000 |
| 1984 | 30,505,361   | 764,664,278 | 52,873,979  | 142,745,000 |
| 1985 | 31,307,880   | 782,085,127 | 54,323,651  | 143,858,000 |
| 1986 | 32,121,290   | 799,607,235 | 55,803,915  | 144,894,000 |
| 1987 | 32,933,081   | 817,232,241 | 57,312,794  | 145,908,000 |
| 1988 | 33,728,498   | 834,944,397 | 58,844,392  | 146,857,000 |
| 1989 | 34,490,549   | 852,736,160 | 60,391,168  | 147,721,000 |
| 1990 | 35,200,000   | 870,601,776 | 61,947,340  | 148,292,000 |
| 1991 | 35,933,108   | 888,513,869 | 63,509,940  | 148,624,000 |
| 1992 | 36,690,739   | 906,461,358 | 65,078,901  | 148,689,000 |
| 1993 | 37,473,796   | 924,475,633 | 66,654,954  | 148,520,000 |

|      |            |               |             |             |
|------|------------|---------------|-------------|-------------|
| 1994 | 38,283,223 | 942,604,211   | 68,240,134  | 148,336,000 |
| 1995 | 39,120,000 | 960,874,982   | 69,835,713  | 148,375,726 |
| 1996 | 40,000,247 | 979,290,432   | 71,437,381  | 148,160,042 |
| 1997 | 40,926,063 | 997,817,250   | 73,042,605  | 147,915,307 |
| 1998 | 41,899,683 | 1,016,402,907 | 74,656,228  | 147,670,692 |
| 1999 | 42,923,485 | 1,034,976,626 | 76,285,225  | 147,214,392 |
| 2000 | 44,000,000 | 1,053,481,072 | 77,932,247  | 146,596,557 |
| 2001 | 44,909,738 | 1,071,888,190 | 79,604,541  | 145,976,083 |
| 2002 | 45,546,345 | 1,090,189,358 | 81,294,378  | 145,306,046 |
| 2003 | 46,127,031 | 1,108,369,577 | 82,971,734  | 144,648,257 |
| 2004 | 46,727,694 | 1,126,419,321 | 84,596,249  | 144,067,054 |
| 2005 | 47,349,013 | 1,144,326,293 | 86,141,373  | 143,518,523 |
| 2006 | 47,991,699 | 1,162,088,305 | 87,592,899  | 143,049,528 |
| 2007 | 48,656,506 | 1,179,685,631 | 88,965,508  | 142,805,088 |
| 2008 | 49,344,228 | 1,197,070,109 | 90,297,115  | 142,742,350 |
| 2009 | 50,055,701 | 1,214,182,182 | 91,641,881  | 142,785,342 |
| 2010 | 50,791,808 | 1,230,984,504 | 93,038,902  | 142,849,449 |
| 2011 | 51,553,479 | 1,247,446,011 | 94,501,233  | 142,960,868 |
| 2012 | 52,341,695 | 1,263,589,639 | 96,017,322  | 143,201,676 |
| 2013 | 53,157,490 | 1,279,498,874 | 97,571,676  | 143,506,911 |
| 2014 | 54,001,953 | 1,295,291,543 | 99,138,690  | 143,819,569 |
| 2015 | 54,490,410 | 1,311,050,530 | 100,699,400 | 143,456,920 |
| 2020 | 56,668,600 | 1,388,858,920 | 108,435,790 | 142,898,120 |
| 2025 | 58,436,200 | 1,461,625,230 | 116,151,400 | 141,205,240 |
| 2030 | 60,034,390 | 1,527,657,990 | 123,575,480 | 138,652,480 |
| 2035 | 61,551,460 | 1,585,349,850 | 130,555,570 | 135,673,910 |
| 2040 | 63,000,650 | 1,633,727,670 | 137,020,460 | 132,892,090 |
| 2045 | 64,347,870 | 1,673,618,770 | 142,920,700 | 130,588,310 |
| 2050 | 65,539,530 | 1,705,332,540 | 148,260,480 | 128,599,240 |
| 2055 | 66,492,950 | 1,729,354,060 | 152,971,280 | 126,654,850 |
| 2060 | 67,183,110 | 1,745,182,410 | 157,074,110 | 124,603,760 |
| 2065 | 67,636,310 | 1,752,843,330 | 160,517,590 | 122,534,290 |
| 2070 | 67,864,580 | 1,753,603,940 | 163,317,760 | 120,727,760 |
| 2075 | 67,878,330 | 1,747,945,830 | 165,483,850 | 119,439,110 |
| 2080 | 67,703,170 | 1,737,150,040 | 167,016,270 | 118,741,290 |
| 2085 | 67,374,090 | 1,722,039,440 | 168,032,680 | 118,471,060 |
| 2090 | 66,920,250 | 1,704,072,950 | 168,609,440 | 118,280,730 |
| 2095 | 66,355,290 | 1,683,339,040 | 168,814,270 | 117,937,540 |
| 2100 | 65,695,710 | 1,659,785,950 | 168,618,220 | 117,444,760 |

## Life expectancy

Changes in life expectancy were approximated for each country by fitting a linear regression function to time series data on life expectancy.<sup>2</sup> Life expectancy for years before 1960 was modeled to be the same as that of 1960. The general mortality rate of HIV negative persons in the Susceptible, Latent TB, or Recovered TB compartments was approximated by the inverse of life expectancy. Data used to calculate country-specific life expectancy are reproduced in Appendix Table 2.

**Appendix Table 2. Country-specific annual life expectancy data used for modeled life expectancy.**

| Year | India    | Philippines | Russia   | South Africa |
|------|----------|-------------|----------|--------------|
| 1960 | 41.17195 | 57.81193    | 66.05529 | 49.03629     |
| 1961 | 41.79049 | 58.12227    | 66.59702 | 49.42980     |
| 1962 | 42.41741 | 58.42885    | 67.02141 | 49.81329     |
| 1963 | 43.05273 | 58.73261    | 67.33990 | 50.19576     |
| 1964 | 43.69841 | 59.03307    | 67.56651 | 50.58176     |
| 1965 | 44.35351 | 59.33327    | 67.71885 | 50.97183     |
| 1966 | 45.01851 | 59.63624    | 67.81251 | 51.36302     |
| 1967 | 45.69093 | 59.94212    | 67.86015 | 51.74941     |
| 1968 | 46.36776 | 60.24546    | 67.87434 | 52.12600     |
| 1969 | 47.04700 | 60.54034    | 67.86712 | 52.49327     |
| 1970 | 47.72707 | 60.81324    | 68.13366 | 52.85068     |
| 1971 | 48.40741 | 61.04617    | 68.37659 | 53.19615     |
| 1972 | 49.08698 | 61.23110    | 68.30854 | 53.53363     |
| 1973 | 49.76029 | 61.36898    | 68.29463 | 53.87056     |
| 1974 | 50.42341 | 61.46534    | 68.32024 | 54.21341     |
| 1975 | 51.06793 | 61.53620    | 67.72390 | 54.57671     |
| 1976 | 51.68946 | 61.59959    | 67.48756 | 54.97446     |
| 1977 | 52.28463 | 61.67751    | 67.37634 | 55.41224     |
| 1978 | 52.84902 | 61.79000    | 67.39098 | 55.89261     |
| 1979 | 53.38071 | 61.94559    | 67.11439 | 56.41405     |
| 1980 | 53.87471 | 62.15476    | 67.03390 | 56.97307     |
| 1981 | 54.32854 | 62.42102    | 67.26390 | 57.56263     |
| 1982 | 54.74461 | 62.73241    | 67.80610 | 58.16720     |
| 1983 | 55.13234 | 63.07339    | 67.65268 | 58.76878     |
| 1984 | 55.49963 | 63.43344    | 67.20268 | 59.35244     |
| 1985 | 55.86090 | 63.79856    | 67.85683 | 59.91217     |
| 1986 | 56.23051 | 64.15373    | 69.38976 | 60.44951     |
| 1987 | 56.61844 | 64.48793    | 69.44000 | 60.95802     |
| 1988 | 57.03112 | 64.79163    | 69.46439 | 61.42380     |
| 1989 | 57.47305 | 65.05937    | 69.17171 | 61.82044     |
| 1990 | 57.94373 | 65.28807    | 68.90244 | 62.12007     |
| 1991 | 58.43822 | 65.48127    | 68.47439 | 62.29480     |
| 1992 | 58.94507 | 65.64846    | 66.87317 | 62.32517     |
| 1993 | 59.45293 | 65.79966    | 64.93585 | 62.19373     |
| 1994 | 59.95483 | 65.93885    | 64.46707 | 61.88798     |
| 1995 | 60.44437 | 66.07056    | 65.22122 | 61.37002     |
| 1996 | 60.91561 | 66.19776    | 66.19415 | 60.60546     |
| 1997 | 61.36956 | 66.32146    | 66.95073 | 59.61320     |
| 1998 | 61.80722 | 66.44217    | 66.78390 | 58.44302     |
| 1999 | 62.22707 | 66.56190    | 66.04366 | 57.15668     |
| 2000 | 62.63063 | 66.68212    | 65.34146 | 55.83688     |
| 2001 | 63.01985 | 66.80239    | 65.48780 | 54.57080     |

|      |          |          |          |          |
|------|----------|----------|----------|----------|
| 2002 | 63.39920 | 66.92166 | 65.08537 | 53.44120 |
| 2003 | 63.77454 | 67.03893 | 65.00756 | 52.52376 |
| 2004 | 64.14780 | 67.15420 | 65.42122 | 51.87376 |
| 2005 | 64.52388 | 67.26649 | 65.47000 | 51.55734 |
| 2006 | 64.90810 | 67.37476 | 66.64317 | 51.61371 |
| 2007 | 65.30044 | 67.47902 | 67.49756 | 51.99651 |
| 2008 | 65.69944 | 67.58078 | 67.84878 | 52.63602 |
| 2009 | 66.10263 | 67.68105 | 68.60488 | 53.46710 |
| 2010 | 66.50615 | 67.78332 | 68.85610 | 54.39076 |
| 2011 | 66.90417 | 67.89066 | 69.65854 | 55.29566 |
| 2012 | 67.28988 | 68.00707 | 70.36585 | 56.09832 |
| 2013 | 67.66041 | 68.13156 | 71.07317 | 56.73659 |

Population denominators for the country-specific median estimates are illustrated in Appendix Figure 1.

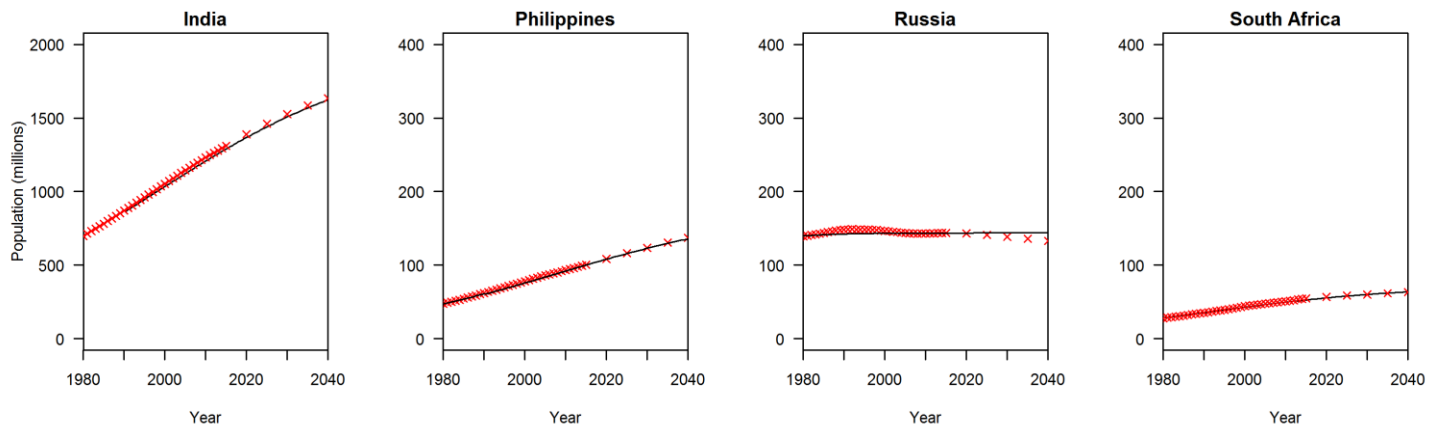

**Appendix Figure 1. Modeled country-specific population projections. Solid lines represent modeled projections; red “X” denotes UN population projections.**

### **Technical Appendix 3. Computational methods**

The base R application<sup>3</sup> was supplemented with several packages for this study. The R package deSolve<sup>4</sup> was used to solve the differential equations, and epiR<sup>5</sup> was used for calculation of partial rank correlation coefficients. Parallel processing using multiple cores was performed using foreach<sup>6</sup> and doParallel<sup>7</sup>. plyr<sup>8</sup> was used to append multiple dataframes into a single dataframe to compute median estimates and 95% prediction intervals.



## Technical Appendix 4. History of HIV emergence and TB control programs

### HIV emergence

Emergence of HIV was modeled by multiplying the susceptible HIV negative compartment by the proportion of PLHIV in a specified year; the product was added to the Susceptible, PLHIV not on ART compartment and subtracted from the Susceptible, HIV-compartment. Based on availability of HIV prevalence data, the HIV epidemic was modeled to begin in 1994 for Russia and 1990 for all other countries.

### Initialization and incorporation of TB treatment and control programs

The initial state of the model assumed that 30% of the susceptible population had latent TB and all TB was fully drug susceptible. Simulations were run using a 1-year time step for 1000 years before 1960 to stabilize initial conditions representing the era before TB treatment became available, and then from 1960 to 2040 using a monthly time step to incorporate the rollout of TB control programs. TB treatment was modeled to become available starting in 1970 for non-MDRTB (i.e., TB without resistance to isoniazid and rifampicin), 1990 for MDRTB (i.e., TB with resistance to isoniazid and rifampicin) and pre-XDRTB (i.e., MDRTB with additional resistance to fluoroquinolones or second line medications), and 2000 for XDRTB (i.e., MDRTB with additional resistance to both fluoroquinolones and second line medications). DOTS was modeled to become available in 1995 in India,<sup>9</sup> 1996 in South Africa,<sup>10</sup> 1997 in the Philippines,<sup>11</sup> and 1994 in Russia.<sup>12</sup> GLC-approved treatment for MDRTB was modeled to expand beyond pilot phases in 2003 in the Philippines and 2005 in Russia.<sup>13</sup> Because GLC-approved PMDT in India was limited to a pilot program in a limited geographical area, the model assumed that MDRTB treatment in India was only in non-GLC conditions. For Russia, the collapse of the United Soviet Socialist Republics was assumed to cause an immediate reduction in treatment initiation rates for non-MDRTB and MDRTB in 1991 followed by a period of recovery of this rate over 10 years. Appendix Table 3 summarizes these data for each modeled country.

### Probability of initiating correct treatment for incident TB

There are insufficient empiric data that describe the length of time taken for a new incident TB case to initiate treatment based on the underlying resistance. In the absence of these empiric data, we used recently reported WHO case detection rates to approximate the probability of initiating correct treatment for incident TB relative as a proportion of the case detection rate (CDR).<sup>14</sup> The case detection rate represents the proportion of smear positive TB cases that are notified in a year. Since the CDR does not account for TB notifications that might be lost to follow up after diagnosis before treatment, does not account for TB that might be detected in facilities that might not report to national TB programs, and does not account for smear-negative or extrapulmonary TB, we used a wide prior distribution of 0% to 100% of the reported CDR to estimate the proportion of incident TB cases that initiate treatment in a year. Because MDRTB cases encounter additional challenges in initiating treatment, including low availability of diagnostic centers and treatment facilities relative to non-MDRTB, we modeled the proportion of incident MDRTB cases that initiate treatment in a year to equal a proportion of incident non-MDRTB that initiated treatment in a year. These wide prior distributions for initiating correct treatment for non-MDRTB and MDRTB were calibrated to reported proportions from drug resistance surveys. Appendix Table 3 lists the case detection rates used for estimating treatment initiation rates; Appendix Table 6 lists the prior and posterior distributions for the probabilities of initiating correct treatment of TB relative to country case detection rates.

**Appendix Table 3. Parameters used to model features of TB treatment and control programs, emergence of the HIV epidemic, and initiation of ART by country.**

| Country      | Year when non-MDRTB treatment became available | Year when MDRTB and pre-XDRTB treatment became available | Year when XDRTB treatment became available | Annual case detection rate | Year when HIV epidemic began | Year when ART became available | Year when DOTS became available | Year when GLC-supported treatment became available |
|--------------|------------------------------------------------|----------------------------------------------------------|--------------------------------------------|----------------------------|------------------------------|--------------------------------|---------------------------------|----------------------------------------------------|
| India        | 1970                                           | 1990                                                     | 2000                                       | 0.6                        | 1990                         | 2003                           | 1995                            | -                                                  |
| Philippines  | 1970                                           | 1990                                                     | 2000                                       | 0.8                        | 1990                         | 2004                           | 1995                            | 2002                                               |
| Russia       | 1970                                           | 1990                                                     | 2000                                       | 0.8                        | 1994                         | 2004                           | 1996                            | 2005                                               |
| South Africa | 1970                                           | 1990                                                     | 2000                                       | 0.75                       | 1990                         | 2003                           | 1996                            | -                                                  |

## Technical Appendix 5. TB and drug resistance observed data for calibration.

The observed data used for calculating a joint likelihood function and subsequent calibration of model projections are presented in Appendix Tables 4 and 5.

If point estimates and confidence intervals were available, then a normal likelihood was generated for the percentage centered at the point estimate with variance approximated from the confidence intervals. For the percentage of MDR among incident TB and the percentage of XDR among incident MDRTB, if point estimates and confidence intervals were not available in drug resistance surveys, then reported numerators and denominators were used to generate a likelihood function based on beta distribution for the corresponding percentage assuming a design effect of two for the survey sample. Beta densities provide a flexible means of modeling unimodal distributions over a finite interval. A design effect of two is used as conventional approach to estimates point estimates and confidence intervals in the absence of information regarding survey design.

Modeled outputs should be calibrated to independent observations. The WHO estimates for TB incidence and HIV-positive TB incidence might not independent empirical observations. To ensure that our calibration process reflects the underlying stability of the model and not merely to annual consecutive WHO estimates, we calibrated the modeled outputs only to WHO estimates from year 2000 and year 2015 with the assumption that these estimates are independent. We assumed that estimates from serial drug resistance surveys are sufficiently independent.

**Appendix Table 4. Country values for TB incidence and Incidence of TB cases who are HIV positive\*.**

| Country      | Year | TB incidence per 100 000 |                |            | Incidence of TB cases who are HIV-positive per 100 000 |                |            |
|--------------|------|--------------------------|----------------|------------|--------------------------------------------------------|----------------|------------|
|              |      | Lower bound              | Point estimate | High bound | Lower bound                                            | Point estimate | High bound |
| India        | 2000 | 149                      | 289            | 473        | 10                                                     | 21             | 35         |
| India        | 2015 | 112                      | 217            | 355        | 4.4                                                    | 8.6            | 14         |
| Philippines  | 2000 | 238                      | 368            | 526        | 0.26                                                   | 0.43           | 0.64       |
| Philippines  | 2015 | 277                      | 322            | 370        | 3.3                                                    | 4.3            | 5.4        |
| Russia       | 2000 | 119                      | 128            | 137        | 1.4                                                    | 1.6            | 1.8        |
| Russia       | 2015 | 69                       | 80             | 92         | 6.5                                                    | 7.9            | 9.4        |
| South Africa | 2000 | 379                      | 585            | 836        | 221                                                    | 349            | 506        |
| South Africa | 2015 | 539                      | 834            | 1190       | 303                                                    | 473            | 680        |

\* Values were obtained from the WHO TB country profiles database.<sup>14</sup>

**Appendix Table 5. Country values for % MDRTB among incident TB and % XDRTB among incident MDRTB.**

| % MDRTB among incident TB |      |             |                |            |               |
|---------------------------|------|-------------|----------------|------------|---------------|
| Country                   | Year | Lower bound | Point estimate | High bound | Source        |
| India*                    | 2006 | 0.069       | 0.084          | 0.099      | <sup>15</sup> |
| Philippines               | 2004 | 0.043       | 0.057          | 0.075      | <sup>16</sup> |
| Philippines               | 2012 | 0.0253      | 0.0335         | 0.0441     | <sup>16</sup> |
| Russia*                   | 2013 | 0.279       | 0.285          | 0.291      | <sup>17</sup> |
| South Africa              | 2002 | 0.020       | 0.028          | 0.036      | <sup>18</sup> |
| South Africa              | 2014 | 0.024       | 0.029          | 0.035      | <sup>18</sup> |

| % XDRTB among incident MDRTB |      |             |                |            |               |
|------------------------------|------|-------------|----------------|------------|---------------|
| Country                      | Year | Lower bound | Point estimate | High bound | Source        |
| India                        | 2006 | 0.012       | 0.032          | 0.066      | <sup>19</sup> |
| Philippines                  | 2012 | 0.0246      | 0.0689         | 0.138      | <sup>16</sup> |
| Russia*                      | 2008 | 0.0193      | 0.0547         | 0.1069     | <sup>19</sup> |
| South Africa                 | 2014 | 0.010       | 0.049          | 0.088      | <sup>18</sup> |

\*Imputed from subnational data.

The fitness of the final projections compared to the observed data are summarized in Appendix Figure 2.

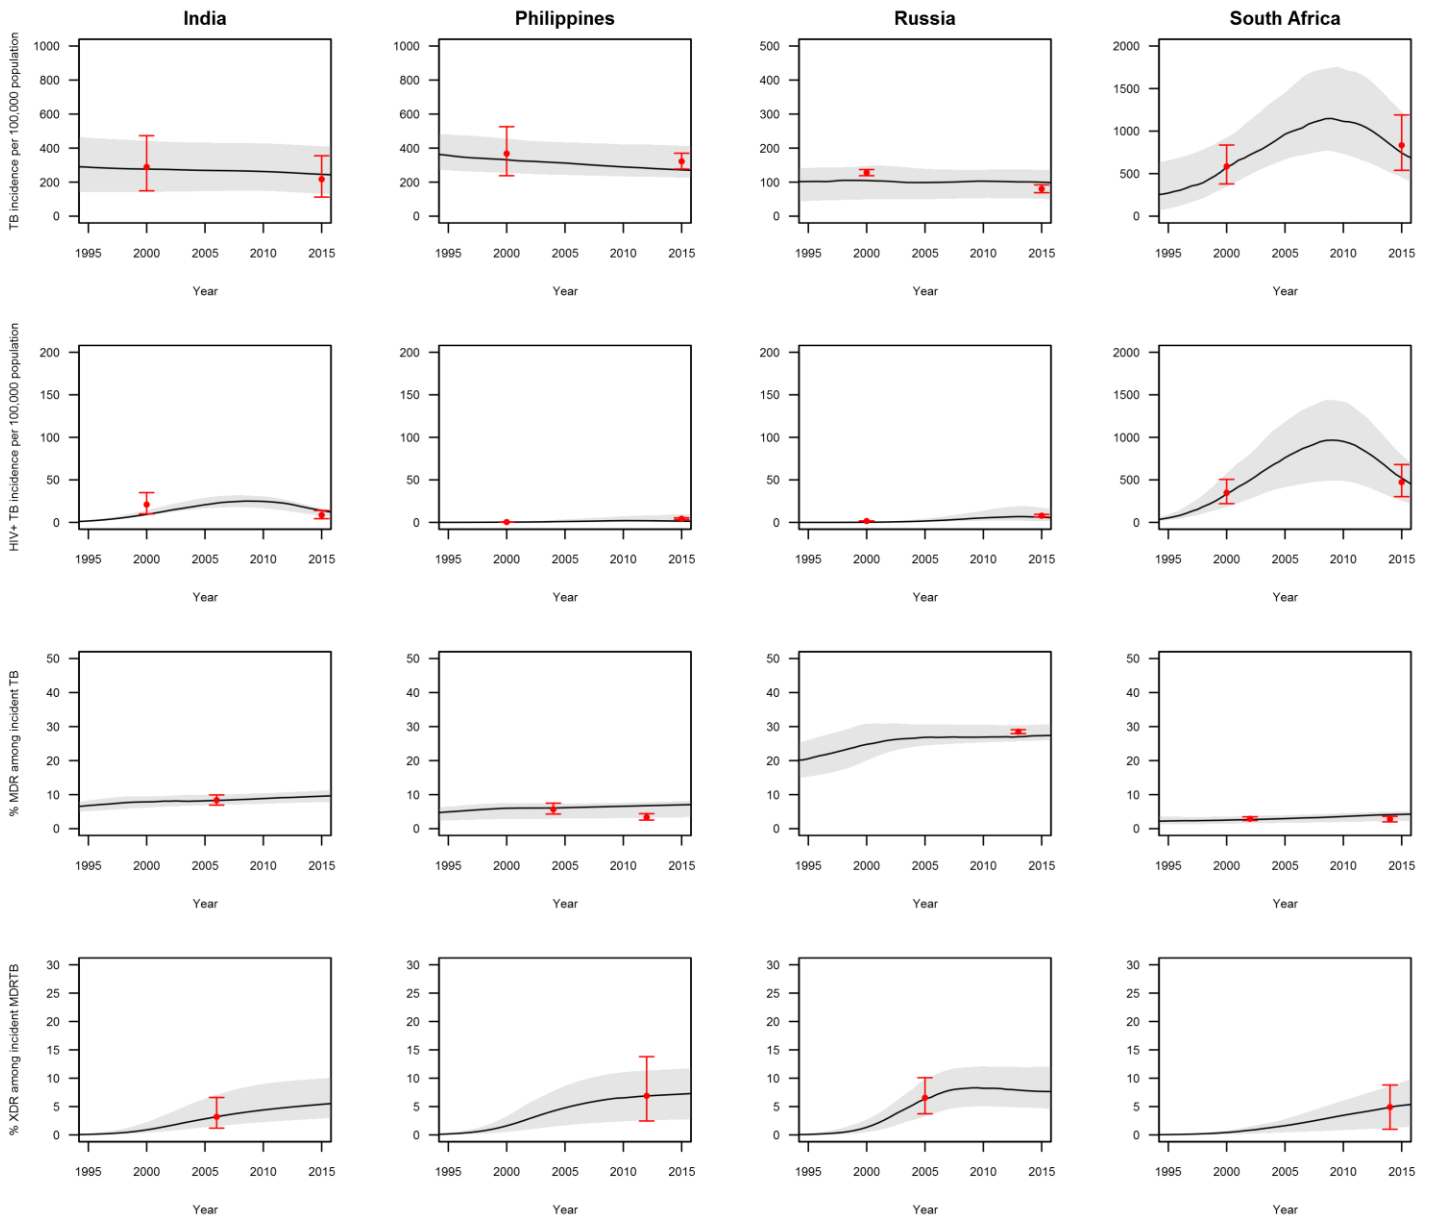

Appendix Figure 2. Country-specific calibrated outcomes based on sampling and weighted resampling. The solid line represents the median projection, the gray shaded region represents 95% prediction intervals, and “X” denotes observed data. MDR = Multidrug-resistant; XDR = Extensively drug-resistant; TB = tuberculosis; HIV+ = HIV positive. Red dots and red lines respectively represent point estimates and bounds of observed data to which the model was calibrated.

## Technical Appendix 6. Prior and posterior distributions.

Prior and country-specific posterior distributions are summarized in Appendix Table 6.

Appendix Table 6. Prior and country-specific posterior distributions for model variables.

| Variable                                                                                                                                                 | Prior distribution |       |       | Posterior distributions |       |       |             |       |       |        |       |       |              |       |       | Source     |
|----------------------------------------------------------------------------------------------------------------------------------------------------------|--------------------|-------|-------|-------------------------|-------|-------|-------------|-------|-------|--------|-------|-------|--------------|-------|-------|------------|
|                                                                                                                                                          |                    |       |       | India                   |       |       | Philippines |       |       | Russia |       |       | South Africa |       |       |            |
|                                                                                                                                                          | 2.5%               | 50.0% | 97.5% | 2.5%                    | 50.0% | 97.5% | 2.5%        | 50.0% | 97.5% | 2.5%   | 50.0% | 97.5% | 2.5%         | 50.0% | 97.5% |            |
| Contact rate for persons with TB*                                                                                                                        | 2.374              | 3.650 | 4.932 | 2.417                   | 3.379 | 4.791 | 2.439       | 3.514 | 4.804 | 2.454  | 3.700 | 4.939 | 2.342        | 3.105 | 4.725 | 20         |
| Probability of initiating appropriate treatment for MDRTB <sup>†</sup> , Pre-XDRTB <sup>‡</sup> , and XDRTB <sup>†</sup> relative to case detection rate | 0.025              | 0.448 | 0.900 | 0.169                   | 0.379 | 0.808 | 0.124       | 0.231 | 0.456 | 0.474  | 0.752 | 0.953 | 0.050        | 0.102 | 0.248 | Calibrated |
| Probability of initiating appropriate treatment for DS <sup>**</sup> TB and INHr/RR <sup>††</sup> TB relative to case detection rate                     | 0.028              | 0.500 | 0.975 | 0.173                   | 0.416 | 0.869 | 0.139       | 0.251 | 0.509 | 0.564  | 0.845 | 0.998 | 0.058        | 0.113 | 0.266 | Calibrated |
| Effective contact rate for PLHIV <sup>§§</sup>                                                                                                           | 0.528              | 1.000 | 1.475 | 0.819                   | 0.950 | 1.054 | 0.521       | 0.794 | 1.065 | 0.771  | 1.045 | 1.296 | 0.642        | 0.878 | 1.225 | Calibrated |
| Probability of acquiring active TB from index case, PLHIV contact                                                                                        | 0.098              | 0.265 | 0.432 | 0.107                   | 0.258 | 0.429 | 0.098       | 0.256 | 0.434 | 0.103  | 0.255 | 0.434 | 0.095        | 0.207 | 0.423 | 20         |
| Probability of acquiring LTBI <sup>¶¶</sup> from index case, PLHIV contact                                                                               | 0.413              | 0.533 | 0.654 | 0.415                   | 0.529 | 0.649 | 0.411       | 0.536 | 0.649 | 0.412  | 0.546 | 0.651 | 0.415        | 0.535 | 0.655 | 20         |
| Probability of acquiring TB from index case, HIV-negative contact                                                                                        | 0.023              | 0.033 | 0.043 | 0.023                   | 0.031 | 0.043 | 0.023       | 0.032 | 0.043 | 0.023  | 0.031 | 0.042 | 0.023        | 0.032 | 0.043 | 20         |
| Probability of acquiring LTBI from index case, HIV-negative contact                                                                                      | 0.473              | 0.514 | 0.556 | 0.476                   | 0.517 | 0.557 | 0.473       | 0.516 | 0.557 | 0.473  | 0.509 | 0.557 | 0.473        | 0.517 | 0.557 | 20         |
| Probability of reactivation of LTBI in 5 years, HIV-negative individual                                                                                  | 0.013              | 0.029 | 0.046 | 0.015                   | 0.030 | 0.044 | 0.016       | 0.031 | 0.046 | 0.012  | 0.022 | 0.040 | 0.013        | 0.029 | 0.045 | 21         |
| Probability of reactivation of LTBI in 1 year, PLHIV not on ART <sup>***</sup>                                                                           | 0.042              | 0.093 | 0.145 | 0.049                   | 0.110 | 0.145 | 0.042       | 0.091 | 0.144 | 0.042  | 0.104 | 0.145 | 0.042        | 0.090 | 0.144 | 22         |
| Probability of death without TB treatment in 10 years, HIV-negative individual                                                                           | 0.634              | 0.700 | 0.766 | 0.636                   | 0.695 | 0.766 | 0.634       | 0.704 | 0.767 | 0.632  | 0.697 | 0.764 | 0.635        | 0.700 | 0.765 | 23         |
| Probability of death without TB treatment in 1 year, PLHIV not on ART                                                                                    | 0.453              | 0.500 | 0.547 | 0.458                   | 0.501 | 0.545 | 0.452       | 0.501 | 0.548 | 0.453  | 0.501 | 0.547 | 0.452        | 0.505 | 0.547 | 23         |
| Probability of relapse among persons with spontaneously recovered TB in 1.5 years                                                                        | 0.091              | 0.100 | 0.109 | 0.091                   | 0.102 | 0.109 | 0.091       | 0.100 | 0.109 | 0.090  | 0.099 | 0.109 | 0.091        | 0.100 | 0.109 | 24         |
| Probability of treatment success for DS TB, HIV-negative, DOTS <sup>†††</sup>                                                                            | 0.790              | 0.809 | 0.829 | 0.790                   | 0.808 | 0.829 | 0.790       | 0.810 | 0.829 | 0.790  | 0.810 | 0.829 | 0.790        | 0.810 | 0.829 | 25         |
| Probability of treatment success for INHr/RR TB, HIV-negative, DOTS                                                                                      | 0.629              | 0.687 | 0.745 | 0.634                   | 0.687 | 0.744 | 0.628       | 0.691 | 0.745 | 0.629  | 0.687 | 0.741 | 0.628        | 0.687 | 0.747 | 25         |
| Probability of treatment failure for DS TB, HIV-negative, DOTS                                                                                           | 0.024              | 0.033 | 0.042 | 0.024                   | 0.033 | 0.040 | 0.024       | 0.031 | 0.042 | 0.024  | 0.034 | 0.042 | 0.024        | 0.033 | 0.041 | 25         |
| Probability of treatment failure for INHr/RR TB, HIV-negative, DOTS                                                                                      | 0.079              | 0.120 | 0.160 | 0.079                   | 0.110 | 0.160 | 0.079       | 0.108 | 0.157 | 0.090  | 0.134 | 0.161 | 0.079        | 0.114 | 0.158 | 25         |
| Probability of ADR <sup>§§§</sup> from DS TB to MDRTB among treatment failures                                                                           | 0.228              | 0.356 | 0.484 | 0.227                   | 0.367 | 0.487 | 0.225       | 0.312 | 0.478 | 0.237  | 0.393 | 0.484 | 0.225        | 0.337 | 0.483 | 25         |

|                                                                                            |       |       |       |       |       |       |       |       |       |       |       |       |       |       |       |       |
|--------------------------------------------------------------------------------------------|-------|-------|-------|-------|-------|-------|-------|-------|-------|-------|-------|-------|-------|-------|-------|-------|
| Probability of ADR from DS TB to INHr/RR TB among treatment failures                       | 0.153 | 0.270 | 0.388 | 0.148 | 0.261 | 0.381 | 0.152 | 0.243 | 0.385 | 0.157 | 0.285 | 0.389 | 0.153 | 0.262 | 0.385 | 25    |
| Probability of ADR from INHr/RR TB to MDRTB among treatment failures                       | 0.549 | 0.706 | 0.865 | 0.547 | 0.685 | 0.863 | 0.548 | 0.705 | 0.862 | 0.565 | 0.755 | 0.863 | 0.548 | 0.683 | 0.862 | 25    |
| Probability of LTFU <sup>***</sup> during treatment for DS TB and INHr/RR TB, HIV-negative | 0.036 | 0.067 | 0.098 | 0.038 | 0.071 | 0.098 | 0.036 | 0.067 | 0.097 | 0.040 | 0.072 | 0.096 | 0.037 | 0.067 | 0.098 | 25    |
| Probability of death during treatment for DS TB and INHr/RR TB, HIV-negative               | 0.045 | 0.078 | 0.112 | 0.049 | 0.078 | 0.112 | 0.047 | 0.079 | 0.111 | 0.045 | 0.080 | 0.111 | 0.045 | 0.079 | 0.113 | 25    |
| Probability of treatment success for DS TB and INHr/RR TB, PLHIV on ART, DOTS              | 0.663 | 0.689 | 0.717 | 0.663 | 0.688 | 0.713 | 0.662 | 0.690 | 0.717 | 0.662 | 0.692 | 0.716 | 0.662 | 0.690 | 0.717 | 26    |
| Probability of treatment failure for DS TB and INHr/RR TB, PLHIV on ART, DOTS              | 0.019 | 0.032 | 0.045 | 0.019 | 0.033 | 0.044 | 0.019 | 0.033 | 0.045 | 0.018 | 0.031 | 0.045 | 0.019 | 0.031 | 0.045 | 27    |
| Probability of LTFU during treatment for DS TB and INHr/RR TB, PLHIV                       | 0.109 | 0.129 | 0.148 | 0.109 | 0.128 | 0.148 | 0.110 | 0.129 | 0.148 | 0.109 | 0.128 | 0.148 | 0.109 | 0.128 | 0.148 | 26    |
| Probability of death during treatment for DS TB and INHr/RR TB, PLHIV on ART               | 0.087 | 0.122 | 0.157 | 0.092 | 0.122 | 0.158 | 0.087 | 0.123 | 0.158 | 0.086 | 0.115 | 0.155 | 0.088 | 0.122 | 0.158 | 27    |
| Probability of treatment success for MDRTB, non-GLC                                        | 0.451 | 0.508 | 0.565 | 0.455 | 0.507 | 0.563 | 0.450 | 0.511 | 0.565 | 0.454 | 0.502 | 0.560 | 0.450 | 0.512 | 0.566 | PETTS |
| Probability of death during treatment for MDRTB, non-GLC                                   | 0.081 | 0.117 | 0.154 | 0.083 | 0.117 | 0.153 | 0.082 | 0.117 | 0.154 | 0.081 | 0.121 | 0.152 | 0.082 | 0.120 | 0.153 | PETTS |
| Probability of ADR to pre-XDRTB during treatment for MDRTB, non-GLC                        | 0.071 | 0.106 | 0.141 | 0.071 | 0.105 | 0.141 | 0.072 | 0.106 | 0.141 | 0.072 | 0.107 | 0.140 | 0.073 | 0.105 | 0.141 | PETTS |
| Probability of ADR to XDRTB during treatment for MDRTB, non-GLC                            | 0.022 | 0.045 | 0.068 | 0.022 | 0.046 | 0.067 | 0.024 | 0.053 | 0.068 | 0.022 | 0.047 | 0.068 | 0.024 | 0.047 | 0.068 | PETTS |
| Probability of treatment success for pre-XDRTB, non-GLC                                    | 0.133 | 0.200 | 0.267 | 0.130 | 0.193 | 0.263 | 0.130 | 0.198 | 0.269 | 0.136 | 0.209 | 0.267 | 0.130 | 0.195 | 0.267 | PETTS |
| Probability of death during treatment for pre-XDRTB, non-GLC                               | 0.118 | 0.183 | 0.248 | 0.119 | 0.177 | 0.248 | 0.118 | 0.191 | 0.249 | 0.117 | 0.177 | 0.246 | 0.117 | 0.180 | 0.246 | PETTS |
| Probability of ADR to XDRTB during treatment for pre-XDRTB, non-GLC                        | 0.285 | 0.366 | 0.448 | 0.284 | 0.361 | 0.442 | 0.284 | 0.368 | 0.449 | 0.287 | 0.368 | 0.451 | 0.288 | 0.369 | 0.450 | PETTS |
| Probability of treatment success for XDRTB, non-GLC                                        | 0.047 | 0.102 | 0.158 | 0.048 | 0.096 | 0.158 | 0.047 | 0.099 | 0.158 | 0.046 | 0.093 | 0.157 | 0.049 | 0.102 | 0.158 | PETTS |
| Probability of death during treatment for XDRTB, non-GLC                                   | 0.421 | 0.515 | 0.610 | 0.429 | 0.503 | 0.608 | 0.421 | 0.519 | 0.612 | 0.423 | 0.507 | 0.613 | 0.424 | 0.519 | 0.610 | PETTS |
| Probability of LTFU during treatment for MDRTB, pre-XDRTB, or XDRTB, non-GLC               | 0.120 | 0.150 | 0.180 | 0.121 | 0.149 | 0.181 | 0.119 | 0.150 | 0.180 | 0.121 | 0.151 | 0.177 | 0.121 | 0.153 | 0.181 | PETTS |
| Probability of treatment success for MDRTB, GLC****                                        | 0.505 | 0.557 | 0.610 | -     | -     | -     | 0.507 | 0.556 | 0.609 | 0.505 | 0.555 | 0.608 | -     | -     | -     | PETTS |
| Probability of death during treatment for MDRTB, GLC                                       | 0.068 | 0.099 | 0.129 | -     | -     | -     | 0.068 | 0.102 | 0.130 | 0.066 | 0.096 | 0.129 | -     | -     | -     | PETTS |
| Probability of ADR to pre-XDRTB during treatment for MDRTB, GLC                            | 0.044 | 0.070 | 0.096 | -     | -     | -     | 0.045 | 0.071 | 0.097 | 0.044 | 0.069 | 0.097 | -     | -     | -     | PETTS |
| Probability of ADR to XDRTB during treatment for MDRTB, GLC                                | 0.006 | 0.019 | 0.032 | -     | -     | -     | 0.006 | 0.020 | 0.032 | 0.006 | 0.021 | 0.032 | -     | -     | -     | PETTS |
| Probability of treatment success for pre-XDRTB, GLC                                        | 0.426 | 0.508 | 0.589 | -     | -     | -     | 0.429 | 0.504 | 0.592 | 0.428 | 0.509 | 0.584 | -     | -     | -     | PETTS |

|                                                                             |       |       |        |       |       |        |       |       |        |       |        |        |       |       |        |            |
|-----------------------------------------------------------------------------|-------|-------|--------|-------|-------|--------|-------|-------|--------|-------|--------|--------|-------|-------|--------|------------|
| Probability of death during treatment for pre-XDRTB, GLC                    | 0.058 | 0.107 | 0.157  | -     | -     | -      | 0.057 | 0.101 | 0.156  | 0.059 | 0.103  | 0.156  | -     | -     | -      | PETTS      |
| Probability of ADR to XDRTB during treatment for pre-XDRTB, GLC             | 0.064 | 0.115 | 0.166  | -     | -     | -      | 0.065 | 0.117 | 0.166  | 0.070 | 0.125  | 0.167  | -     | -     | -      | PETTS      |
| Probability of treatment success for XDRTB, GLC                             | 0.198 | 0.325 | 0.454  | -     | -     | -      | 0.197 | 0.321 | 0.452  | 0.205 | 0.311  | 0.450  | -     | -     | -      | PETTS      |
| Probability of death during treatment for XDRTB, GLC                        | 0.124 | 0.238 | 0.353  | -     | -     | -      | 0.124 | 0.232 | 0.350  | 0.122 | 0.225  | 0.349  | -     | -     | -      | PETTS      |
| Probability of LTFU during treatment for MDRTB, pre-XDRTB, or XDRTB, GLC    | 0.167 | 0.201 | 0.235  | -     | -     | -      | 0.168 | 0.200 | 0.235  | 0.174 | 0.201  | 0.236  | -     | -     | -      | PETTS      |
| Probability of relapse for successfully treated TB, HIV-                    | 0.011 | 0.016 | 0.021  | 0.011 | 0.016 | 0.021  | 0.011 | 0.016 | 0.021  | 0.011 | 0.016  | 0.021  | 0.011 | 0.016 | 0.021  | 28         |
| Probability of relapse for successfully treated TB, PLHIV not on ART        | 0.031 | 0.041 | 0.051  | 0.030 | 0.042 | 0.050  | 0.031 | 0.041 | 0.051  | 0.031 | 0.042  | 0.052  | 0.031 | 0.041 | 0.051  | 28         |
| Probability of relapse for successfully treated TB, PLHIV on ART            | 0.018 | 0.036 | 0.053  | 0.018 | 0.033 | 0.053  | 0.018 | 0.035 | 0.053  | 0.018 | 0.036  | 0.052  | 0.018 | 0.037 | 0.053  | 28         |
| Probability of death, PLHIV not on ART                                      | 0.085 | 0.095 | 0.104  | 0.085 | 0.095 | 0.104  | 0.085 | 0.093 | 0.104  | 0.085 | 0.095  | 0.105  | 0.085 | 0.095 | 0.105  | 29         |
| Probability of death, PLHIV on ART                                          | 0.030 | 0.034 | 0.037  | 0.030 | 0.033 | 0.037  | 0.030 | 0.033 | 0.037  | 0.030 | 0.034  | 0.037  | 0.030 | 0.033 | 0.037  | 29,30      |
| Risk of stopping ART, PLHIV on ART                                          | 0.026 | 0.029 | 0.032  | 0.026 | 0.029 | 0.032  | 0.026 | 0.029 | 0.032  | 0.026 | 0.029  | 0.032  | 0.026 | 0.029 | 0.032  | 29,30      |
| Relative risk of failure during TB treatment, INHr/RR TB to DS TB           | 6.977 | 9.500 | 12.036 | 7.126 | 9.376 | 11.869 | 6.920 | 9.579 | 12.067 | 7.047 | 9.204  | 11.989 | 7.093 | 9.594 | 12.090 | 31         |
| Hazard ratio of TB incidence, PLHIV not on ART to PLHIV on ART              | 2.517 | 2.800 | 3.085  | 2.531 | 2.836 | 3.094  | 2.517 | 2.801 | 3.087  | 2.517 | 2.753  | 3.066  | 2.518 | 2.824 | 3.077  | 32         |
| Hazard ratio of TB treatment success, PLHIV on ART to PLHIV not on ART      | 1.760 | 4.500 | 7.255  | 1.752 | 4.468 | 7.343  | 1.809 | 4.931 | 7.283  | 1.670 | 4.422  | 7.251  | 1.877 | 4.688 | 7.319  | 33         |
| Hazard ratio of death during TB treatment, PLHIV on ART to PLHIV not on ART | 0.308 | 0.450 | 0.592  | 0.307 | 0.430 | 0.581  | 0.306 | 0.453 | 0.592  | 0.307 | 0.443  | 0.589  | 0.308 | 0.450 | 0.595  | 33         |
| Hazard ratio of ADR during treatment, non-DOTS to DOTS                      | 3.931 | 8.080 | 12.251 | 4.005 | 6.781 | 12.073 | 3.762 | 5.190 | 11.467 | 7.383 | 10.796 | 12.454 | 3.788 | 6.511 | 11.481 | 34         |
| Proportion of DS TB and INHr/RR TB treated in DOTS programs                 | 0.028 | 0.500 | 0.975  | 0.031 | 0.560 | 0.990  | 0.056 | 0.672 | 0.981  | 0.029 | 0.380  | 0.944  | 0.034 | 0.601 | 0.976  | Calibrated |
| Proportion of MDRTB, Pre-XDRTB, and XDRTB treated in GLC programs           | 0.028 | 0.500 | 0.975  | -     | -     | -      | 0.012 | 0.395 | 0.962  | 0.015 | 0.463  | 0.952  | -     | -     | -      | Calibrated |
| Proportion of PLHIV not on ART who initiate ART                             | 0.306 | 0.400 | 0.495  | 0.312 | 0.420 | 0.496  | 0.304 | 0.392 | 0.495  | 0.307 | 0.418  | 0.494  | 0.305 | 0.395 | 0.492  | Calibrated |

\*TB = Tuberculosis. †MDRTB = Multidrug-resistant TB (TB resistant to isoniazid and rifampicin). ‡Pre-XDRTB = TB resistant to isoniazid, rifampicin, and either fluoroquinolones or second line injectable drugs. ††XDRTB = Extensively drug-resistant TB (TB resistant to isoniazid, rifampicin, fluoroquinolones, and second line injectable drugs). \*\*DS = Susceptible to isoniazid and rifampicin. †††INHr/RR = Resistant to either isoniazid or rifampicin. ‡‡‡PLHIV = People living with HIV. ††††LTBI = Latent tuberculosis infection. †††††ART = Antiretroviral therapy. ††††††DOTS = Directly Observed Therapy, Short-course. ‡‡‡‡‡ADR = acquired drug resistance. †††††LTFU = Lost to follow up. ††††††GLC = Green Light Committee.

## Technical Appendix References

1. United Nations, Department of Economic and Social Affairs, Population Division. *World Population Prospects: The 2015 Revision, Volume I: Comprehensive Tables (ST/ESA/SER.A/379)*.
2. World Bank. World Development Indicators, Life expectancy at birth, total (years). Accessed 1 Feb 2016.
3. R Core Team. R: A Language and Environment for Statistical Computing. Vienna, Austria: R Foundation for Statistical Computing. In:2015.
4. Soetaert K, Petzoldt T, Setzer RW, odepack authors. deSolve: General Solvers for Initial Value Problems of Ordinary Differential Equations (ODE), Partial Differential Equations (PDE), Differential Algebraic Equations (DAE), and Delay Differential Equations (DDE). In. 1.11 ed2014.
5. Stevenson M. epiR: Tools for the Analysis of Epidemiological Data. In. 0.9-69 ed2015.
6. Calaway R, Analytics R, Weston S. foreach: Provides Foreach Looping Construct for R. . In. 1.4.3 ed2015.
7. Calaway R, Revolution Analytics, Weston S, Tenenbaum D. doParallel: Foreach Parallel Adaptor for the 'parallel' Package. In. 1.0.10 ed2015.
8. Hadley W. plyr: Tools for Splitting, Applying and Combining Data. In. 1.8.3 ed2015.
9. World Health Organization. A brief history of tuberculosis control in India. WHO/HTM/TB/2010.4. In. Geneva, Switzerland: WHO; 2010.
10. Weyer K. Case study: South Africa. *Bull World Health Organ.* 2007;85(5):325-420.
11. Vianzon R, Garfin A, Lagos A, Belen R. The tuberculosis profile of the Philippines, 2003-2011: advancing DOTS and beyond. 2013;4(2):11-16.
12. Shukshin A. Tough measures in Russian prisons slow spread of TB. *Bull World Health Organ.* 2006;84(4):265-266.
13. GLC Programmes Applications. [http://www.who.int/tb/challenges/mdr/greenlightcommittee/report\\_glc\\_applications\\_jun2011.pdf](http://www.who.int/tb/challenges/mdr/greenlightcommittee/report_glc_applications_jun2011.pdf). Accessed 29 May 2015.
14. World Health Organization. Tuberculosis Country Profiles. <http://www.who.int/tb/country/data/profiles/en/>. Accessed 1 Nov 2016.
15. World Health Organization. *Anti-tuberculosis drug resistance in the world: fourth global report. WHO/HTM/TB/2008.394.* 2008.
16. Department of Health, Republic of the Philippines. *Second National Drug Resistance Survey on Tuberculosis in the Philippines.* 2014.
17. European Centre for Disease Prevention and Control/WHO Regional Office for Europe. Tuberculosis surveillance and monitoring in Europe. . In. Stockholm: European Centre for Disease Prevention and Control; 2015.
18. National Institute for Communicable Diseases. South African Tuberculosis Drug Resistance Survey 2012-2014. In:2016.
19. World Health Organization. Multidrug and extensively drug-resistant TB (M/XDR-TB): 2010 global report on surveillance and response. WHO/HTM/TB/2010.3. In. Geneva, Switzerland: WHO; 2010.
20. Fox GJ, Barry SE, Britton WJ, Marks GB. Contact investigation for tuberculosis: a systematic review and meta-analysis. *Eur Respir J.* 2013;41(1):140-156.
21. Sloot R, Schim van der Loeff MF, Kouw PM, Borgdorff MW. Risk of tuberculosis after recent exposure. A 10-year follow-up study of contacts in Amsterdam. *Am J Respir Crit Care Med.* 2014;190(9):1044-1052.
22. Selwyn PA, Hartel D, Lewis VA, et al. A prospective study of the risk of tuberculosis among intravenous drug users with human immunodeficiency virus infection. *N Engl J Med.* 1989;320(9):545-550.
23. Tiemersma EW, van der Werf MJ, Borgdorff MW, Williams BG, Nagelkerke NJ. Natural history of tuberculosis: duration and fatality of untreated pulmonary tuberculosis in HIV negative patients: a systematic review. *PLoS One.* 2011;6(4):e17601.
24. National Tuberculosis Institute. Tuberculosis in a rural population of South India: a five-year epidemiological study. *Bull World Health Organ.* 1974;51(5):473-488.
25. Seung KJ, Gelmanova IE, Peremitin GG, et al. The effect of initial drug resistance on treatment response and acquired drug resistance during standardized short-course chemotherapy for tuberculosis. *Clin Infect Dis.* 2004;39(9):1321-1328.
26. El-Sadr WM, Perlman DC, Denning E, Matts JP, Cohn DL. A review of efficacy studies of 6-month short-course therapy for tuberculosis among patients infected with human immunodeficiency virus: differences in study outcomes. *Clin Infect Dis.* 2001;32(4):623-632.
27. Khan FA, Minion J, Pai M, et al. Treatment of active tuberculosis in HIV-coinfected patients: a systematic review and meta-analysis. *Clin Infect Dis.* 2010;50(9):1288-1299.
28. Houben RM, Glynn JR, Mboma S, et al. The impact of HIV and ART on recurrent tuberculosis in a sub-Saharan setting. *AIDS.* 2012;26(17):2233-2239.

29. Anglaret X, Minga A, Gabillard D, et al. AIDS and non-AIDS morbidity and mortality across the spectrum of CD4 cell counts in HIV-infected adults before starting antiretroviral therapy in Cote d'Ivoire. *Clin Infect Dis*. 2012;54(5):714-723.
30. Gabillard D, Lewden C, Ndoye I, et al. Mortality, AIDS-Morbidity, and Loss to Follow-up by Current CD4 Cell Count Among HIV-1-Infected Adults Receiving Antiretroviral Therapy in Africa and Asia: Data From the ANRS 12222 Collaboration. *JAIDS Journal of Acquired Immune Deficiency Syndromes*. 2013;62(5):555-561.
31. Lew W, Pai M, Oxlade O, Martin D, Menzies D. Initial drug resistance and tuberculosis treatment outcomes: systematic review and meta-analysis. *Ann Intern Med*. 2008;149(2):123-134.
32. Alvarez-Uria G, Pakam R, Midde M, Naik PK. Incidence and mortality of tuberculosis before and after initiation of antiretroviral therapy: an HIV cohort study in India. *J Int AIDS Soc*. 2014;17:19251.
33. Arentz M, Pavlinac P, Kimerling ME, et al. Use of anti-retroviral therapy in tuberculosis patients on second-line anti-TB regimens: a systematic review. *PLoS One*. 2012;7(11):e47370.
34. Weis SE, Slocum PC, Blais FX, et al. The effect of directly observed therapy on the rates of drug resistance and relapse in tuberculosis. *N Engl J Med*. 1994;330(17):1179-1184.
